# Supplementary material
Source: PubMed Central journal article supplement (PMC7241298)
Supplement: NIHMS1587256-supplement-01.pdf [file NIHMS1587256-supplement-01.pdf]

A

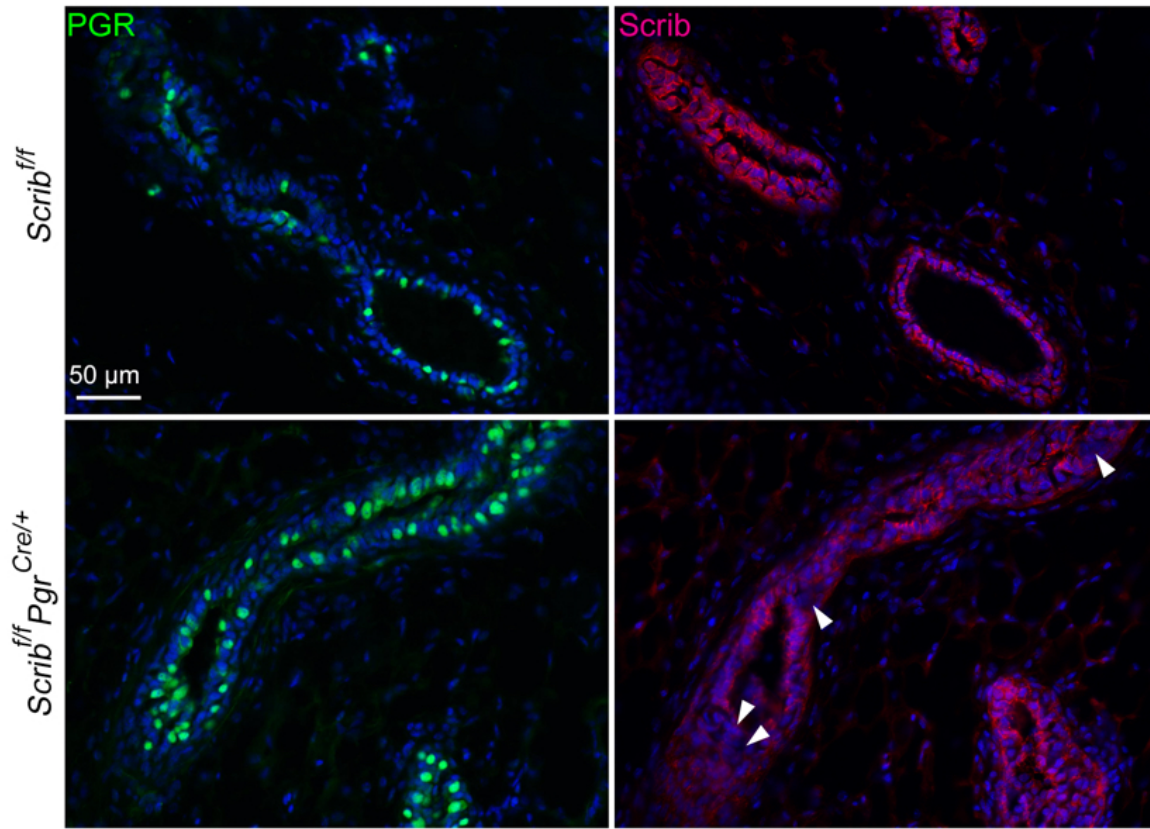

Serial IF of PGR and Scrib (day 5 of pregnancy)

B

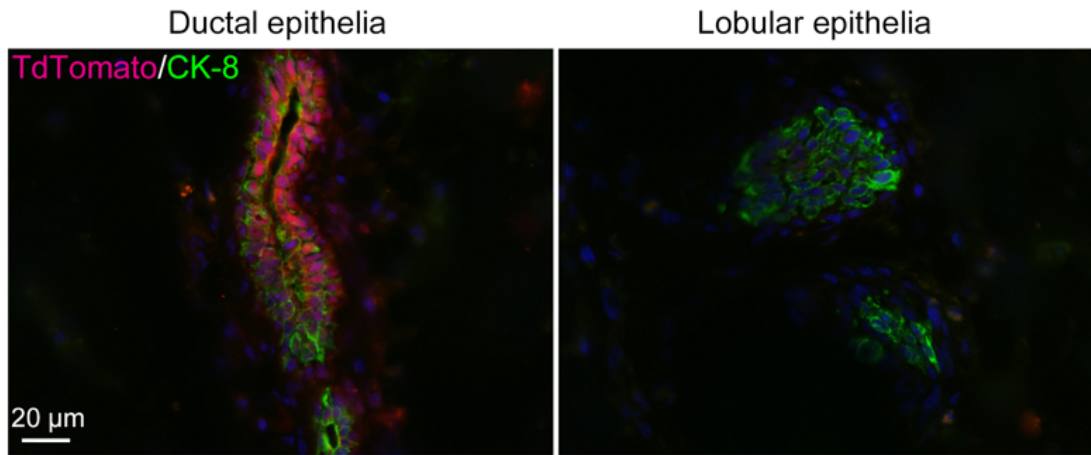

IF of CK-8 in *RosaTdTomato x Ltf-Cre/+* mammary gland (day 5 of pregnancy)

Supplementary Figure 1
