# Supplementary material
Source: PubMed Central journal article supplement (PMC7241298)

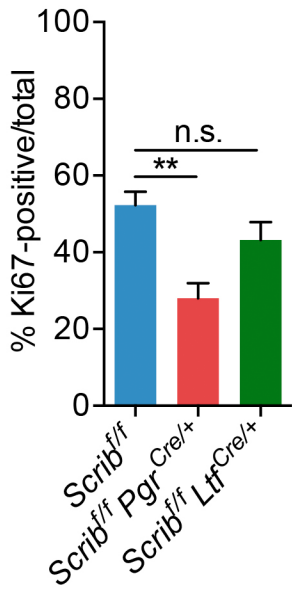

Supplementary Figure 2

Supplement: NIHMS1587256-supplement-02.pdf [file NIHMS1587256-supplement-02.pdf]

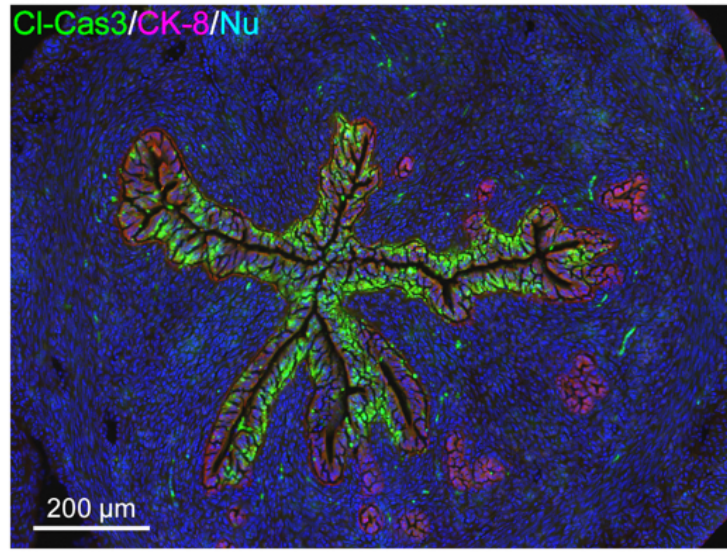

Supplementary Figure 3

Supplement: NIHMS1587256-supplement-03.pdf [file NIHMS1587256-supplement-03.pdf]
